# Supplementary material
Source: PubMed Central journal article supplement (PMC6962021)
Supplement: jciinsight-4-133103-s113.pdf [file jciinsight-4-133103-s113.pdf]

# Supplementary Figure 1

**A**

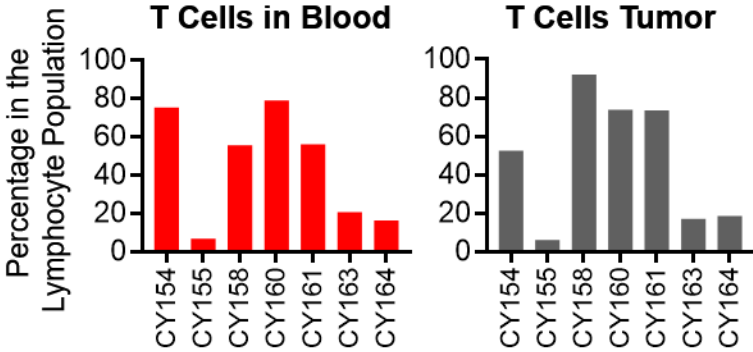

**B**

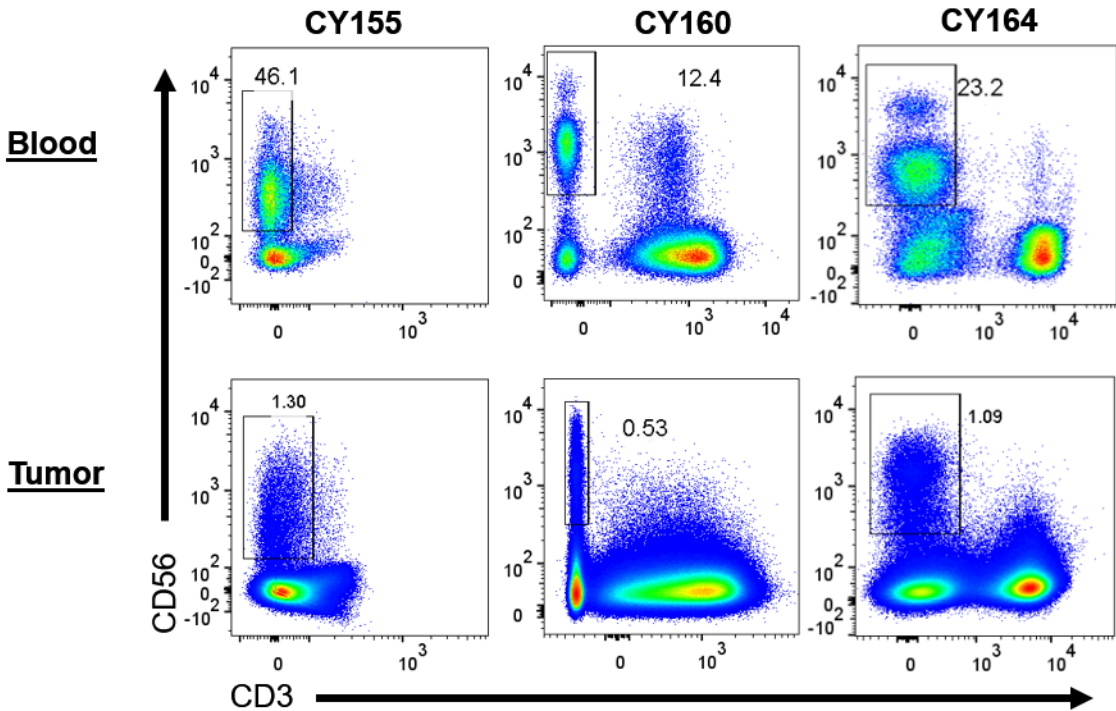

# Supplementary Figure 2

## A

**CY155**

● **Blood NK Cells (2801 cells)**  
● **Tumor-Infiltrating NK Cells (1752 cells)**

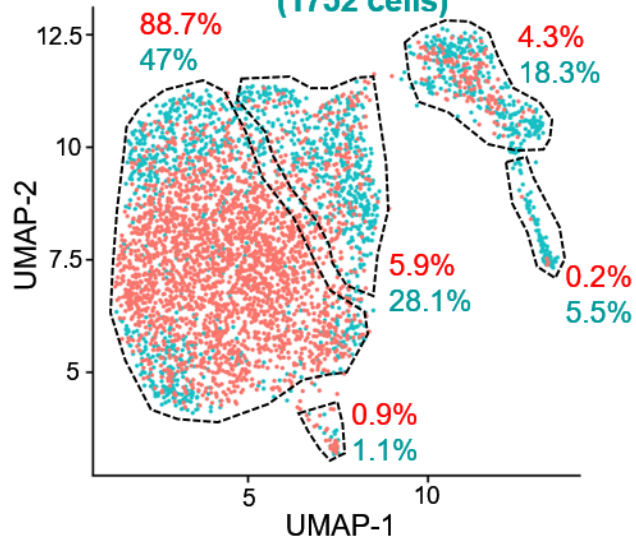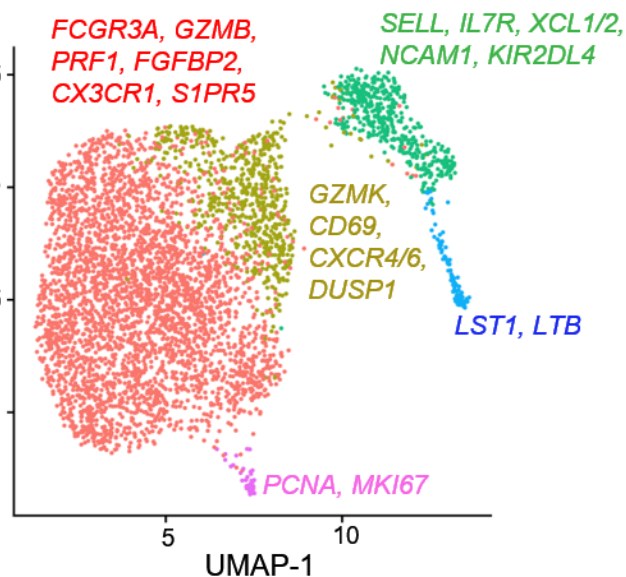

## B

**CY160**

● **Blood NK Cells (3945 cells)**  
● **Tumor-Infiltrating NK Cells (3929 cells)**

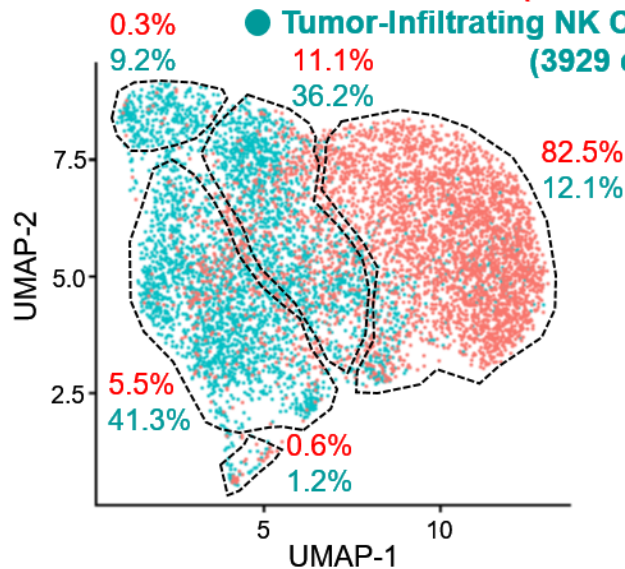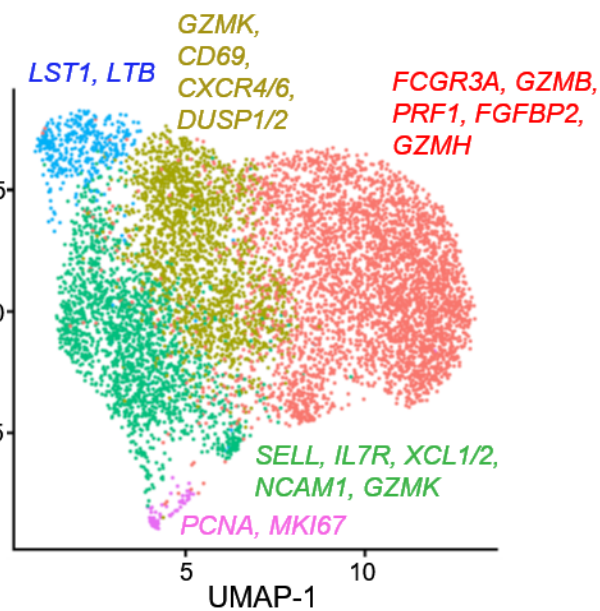

## C

**CY164**

● **Blood NK Cells (4610 cells)**  
● **Tumor-Infiltrating NK Cells (2781 cells)**

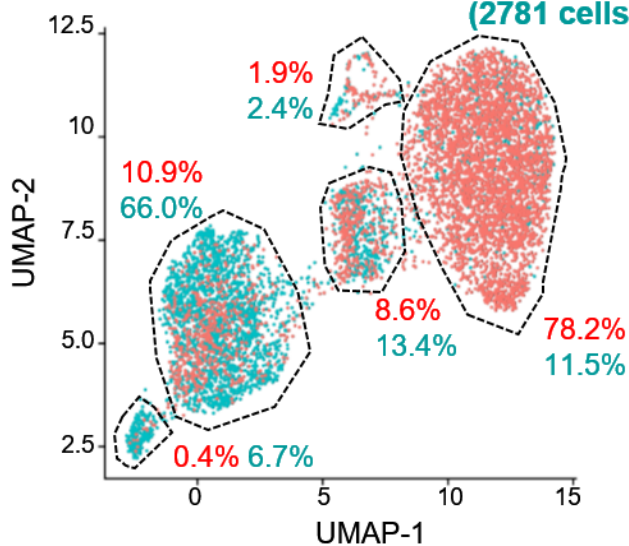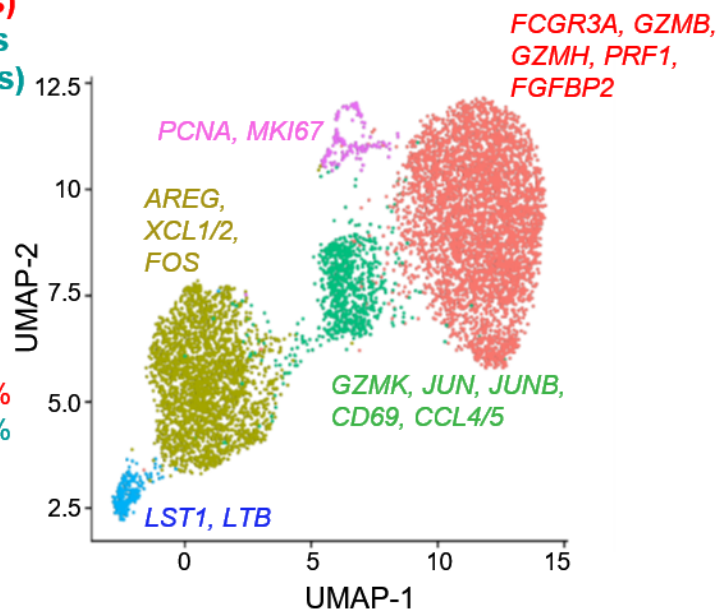

### Supplementary Figure 3

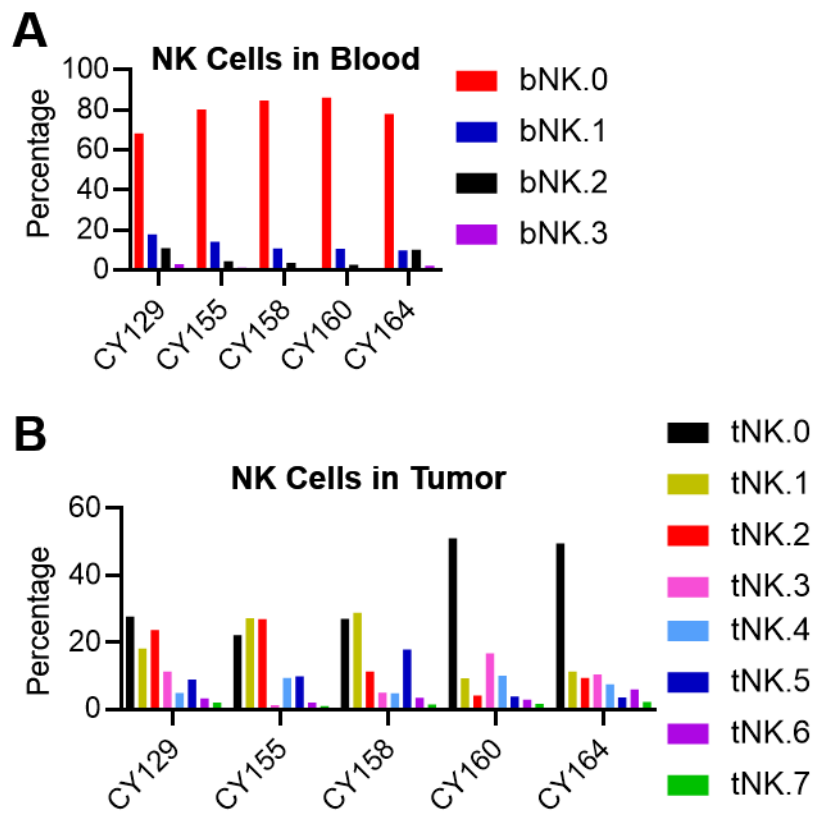

## Supplementary Figure 4

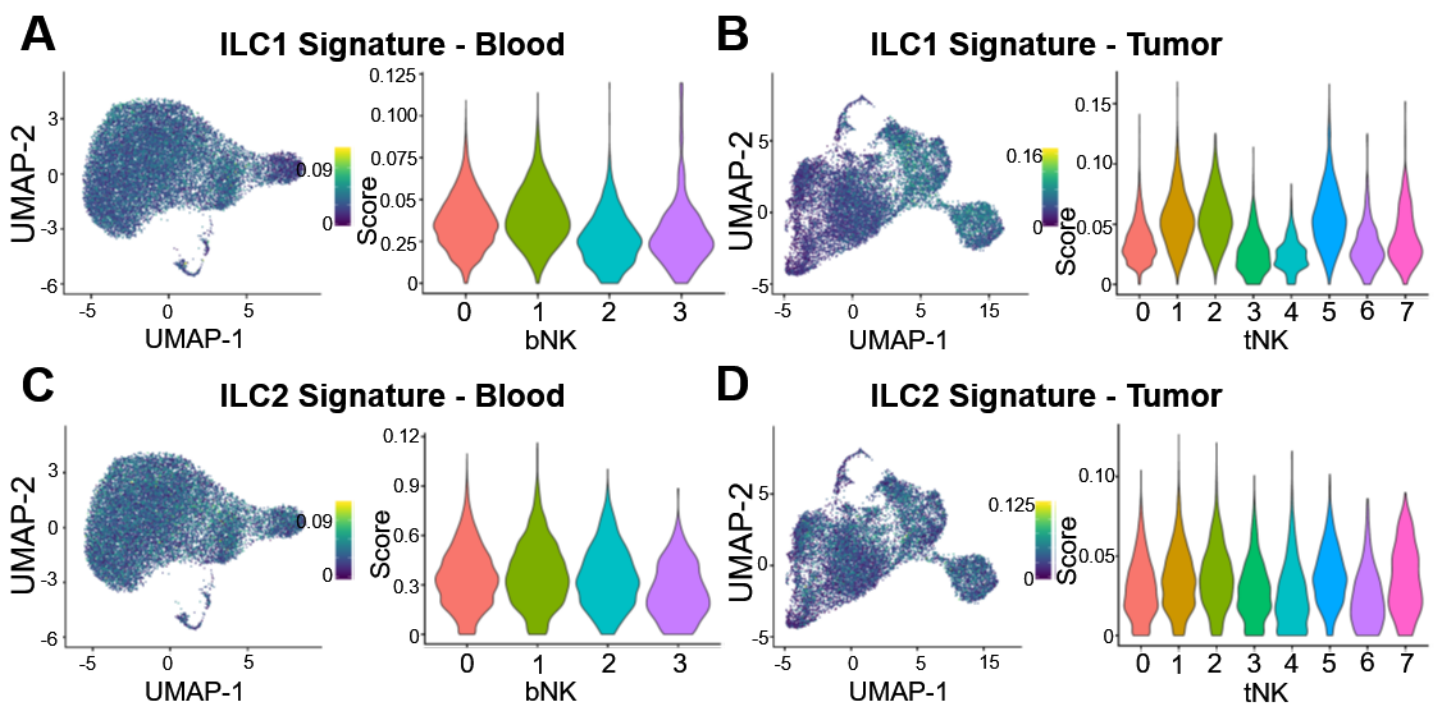

Supplementary Figure 5

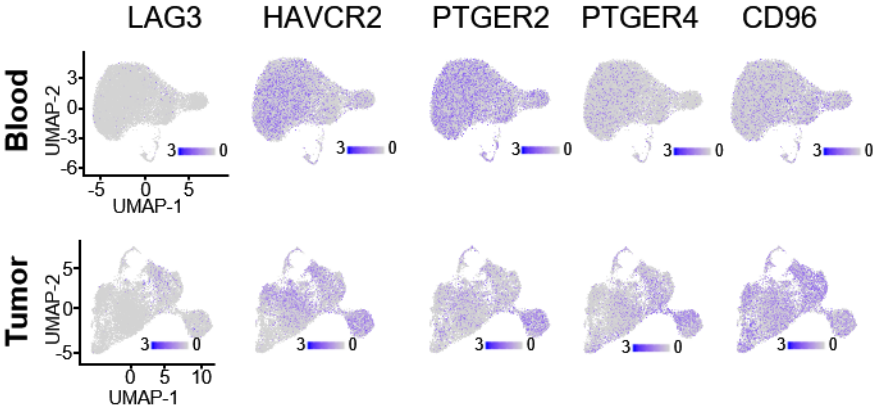

Supplementary Figure 6

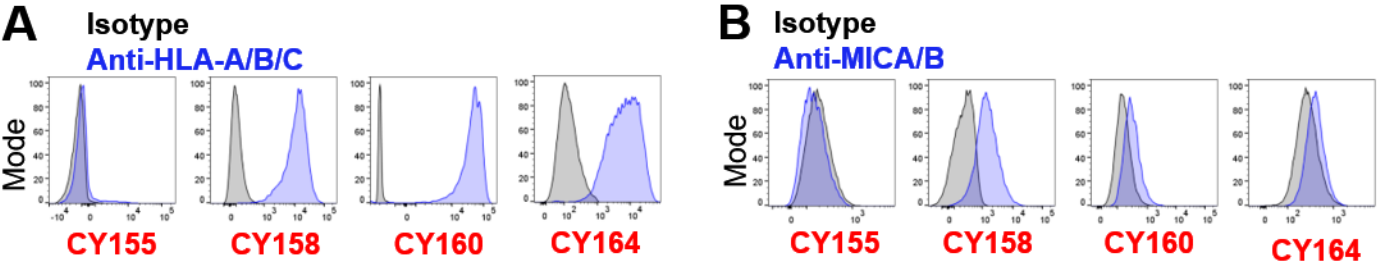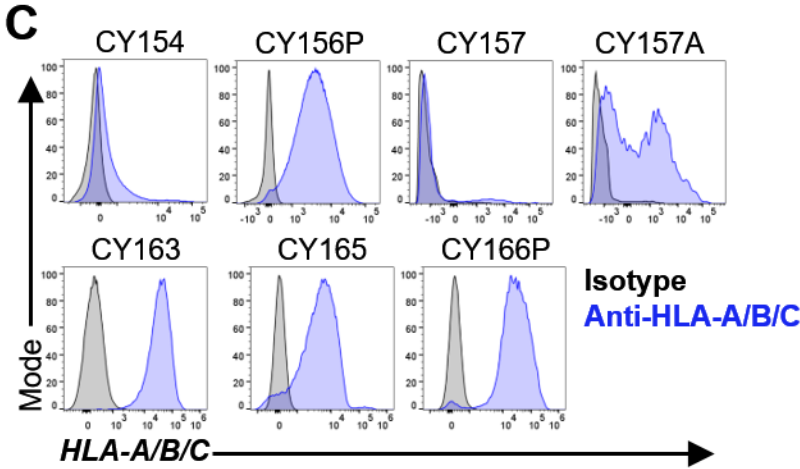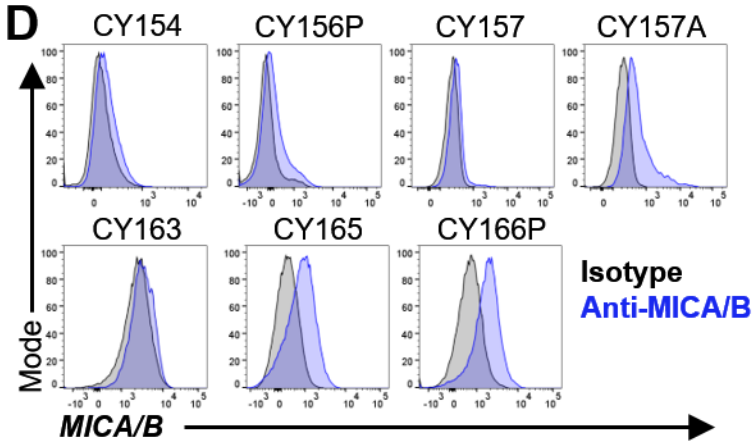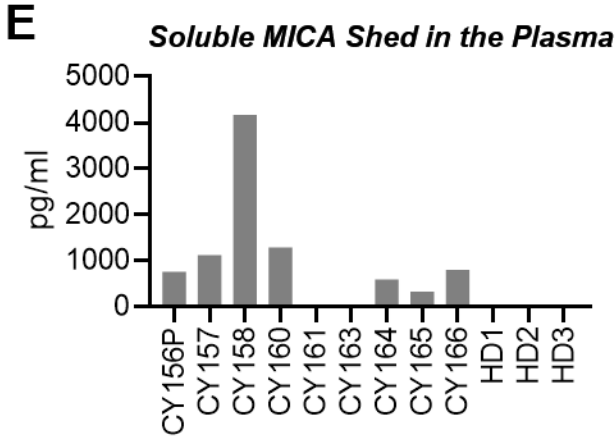



| Patient | Gender | Age | Site of tumor sample (metastasis or primary) | Mutation status (BRAF, NRAS)                                     | Prior therapy (anti-PD1, anti-CTLA4)                               | Time elapsed since last treatment with systemic therapy          | Any other prior treatment (chemo) |
|---------|--------|-----|----------------------------------------------|------------------------------------------------------------------|--------------------------------------------------------------------|------------------------------------------------------------------|-----------------------------------|
| CY129.2 | M      | 65  | Lymph node (metastasis)                      | BRAF <sup>wt</sup> NRAS <sup>wt</sup>                            | Nivolumab + Pembrolizumab                                          | Tumor removed during Pembrolizumab                               | n/a                               |
| CY155   | F      | 66  | lymph node, axillary (metastasis)            | unknown                                                          | Pembrolizumab                                                      | <14 days                                                         | n/a                               |
| CY158   | F      | 58  | small bowel, jejunum (metastasis)            | BRAF V600E                                                       | Ipilimumab                                                         | 20 months                                                        | n/a                               |
| CY160   | M      | 67  | lymph node, axillary (metastasis)            | BRAF G469K (oncopanel)                                           | none                                                               | n/a                                                              | n/a                               |
| CY164   | F      | 58  | lymph node, femoral (metastasis)             | Unknown                                                          | Pembrolizumab + TVEC                                               | Pembrolizumab: 22 months<br>TVEC: 15 months                      | n/a                               |
| CY154   | F      | 38  | lymph node, femoral (metastasis)             | MAP2K1 D67N<br>MAP2K1 P124R (oncopanel)                          | Nivolumab                                                          | 18 days                                                          | n/a                               |
| CY156P  | M      | 61  | skin, arm (primary)                          | not BRAF V600E (others not tested)                               | none                                                               | n/a                                                              | n/a                               |
| CY157   | M      | 69  | lymph node, axillary (metastasis)            | NRAS G13D<br>JAK2 V617F (oncopanel)                              | none                                                               | n/a                                                              | n/a                               |
| CY161   | M      | 59  | lymph node, femoral (metastasis)             | BRAF V600E                                                       | Pembrolizumab + TVEC<br>*BRAF + MEK inhibitors                     | Pembrolizumab + TVEC: 2 months<br>*BRAF + MEK inhibitor: 4 weeks | *BRAF + MEK inhibitor             |
| CY163   | M      | 70  | soft tissue, arm (metastasis)                | NRAS G13C<br>NF1 Q531*<br>NF1 Q2616*<br>PI3KCA R818C (oncopanel) | Pembrolizumab                                                      | 10 days                                                          | n/a                               |
| CY165   | F      | 84  | lymph node, axillary (metastasis)            | NRAS G12A (oncopanel)                                            | Pembrolizumab *prior<br>Pembrolizumab + Epcadostat trial (blinded) | Pembrolizumab: 15 days                                           | n/a                               |
| CY166P  | F      | 63  | skin, back (primary)                         | not BRAF V600E (others not tested)                               | none *patient immunosuppressed for renal transplant                | n/a                                                              | n/a                               |
| CY166   | F      | 63  | skin, back (metastasis, in-transit)          | not BRAF V600E (others not tested)                               | none *patient immunosuppressed for renal transplant                | n/a                                                              | n/a                               |
